# Supplementary material for: Investigations and system design for simultaneous energy and data transmission through inductively coupled resonances
Source: Copernicus journal article supplement (doi:10.5194/ars-13-217-2015), 2015-11-03
Supplement: Supplementary file 1 [file ars-13-217-2015-supplement.zip]

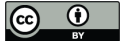

## *Supplement of*

# **Investigations and system design for simultaneous energy and data transmission through inductively coupled resonances**

**C. Schmidt et al.**

*Correspondence to:* C. Schmidt ([christian.schmidt@htwsaar.de](mailto:christian.schmidt@htwsaar.de))

- [ars-13-217-2015-supplement-title-page.pdf](#)
- [k\\_factor.ods](#)
- [plot\\_data.m](#)
- [plot\\_data.mat](#)

The copyright of individual parts of the supplement might differ from the CC-BY 3.0 licence.
